# Supplementary material
Source: publisher figshare collection journal article supplement (https://tandf.figshare.com/ndownloader/files/14887289)
Supplement: Supplementary file 1 [file 14887289]

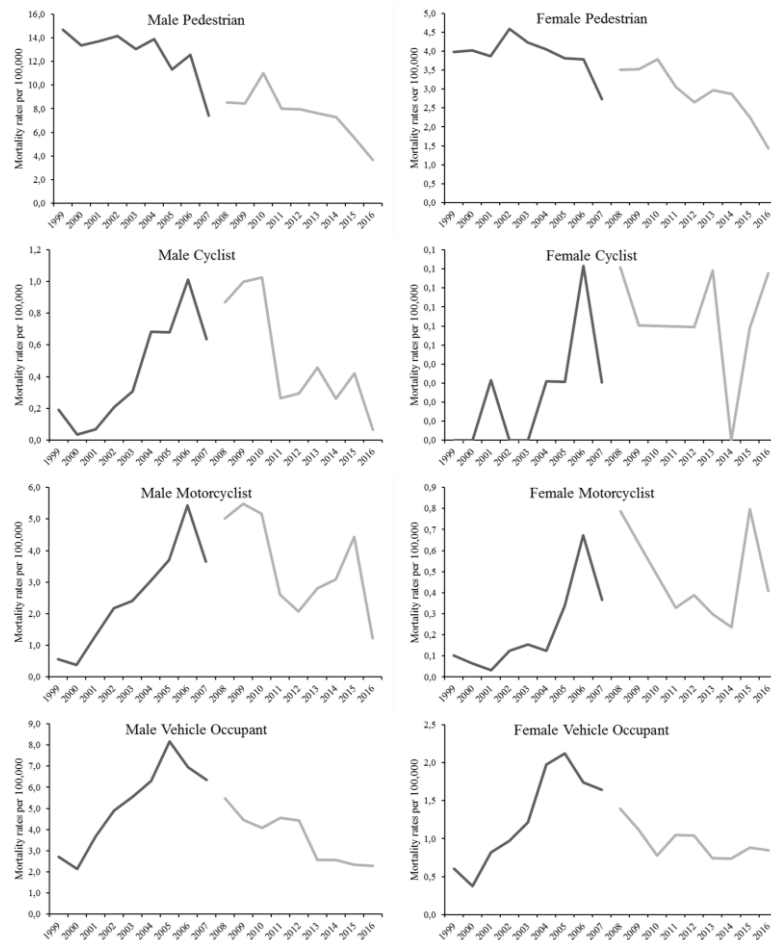

**Appendix 1.** Evolution of mortality rates due to road traffic accidents, by type of victim and according to sex, before and after the Brazilian zero-tolerance drinking and driving law that came into effect on June 19, 2008. Rio de Janeiro, Brazil, 1999-2016

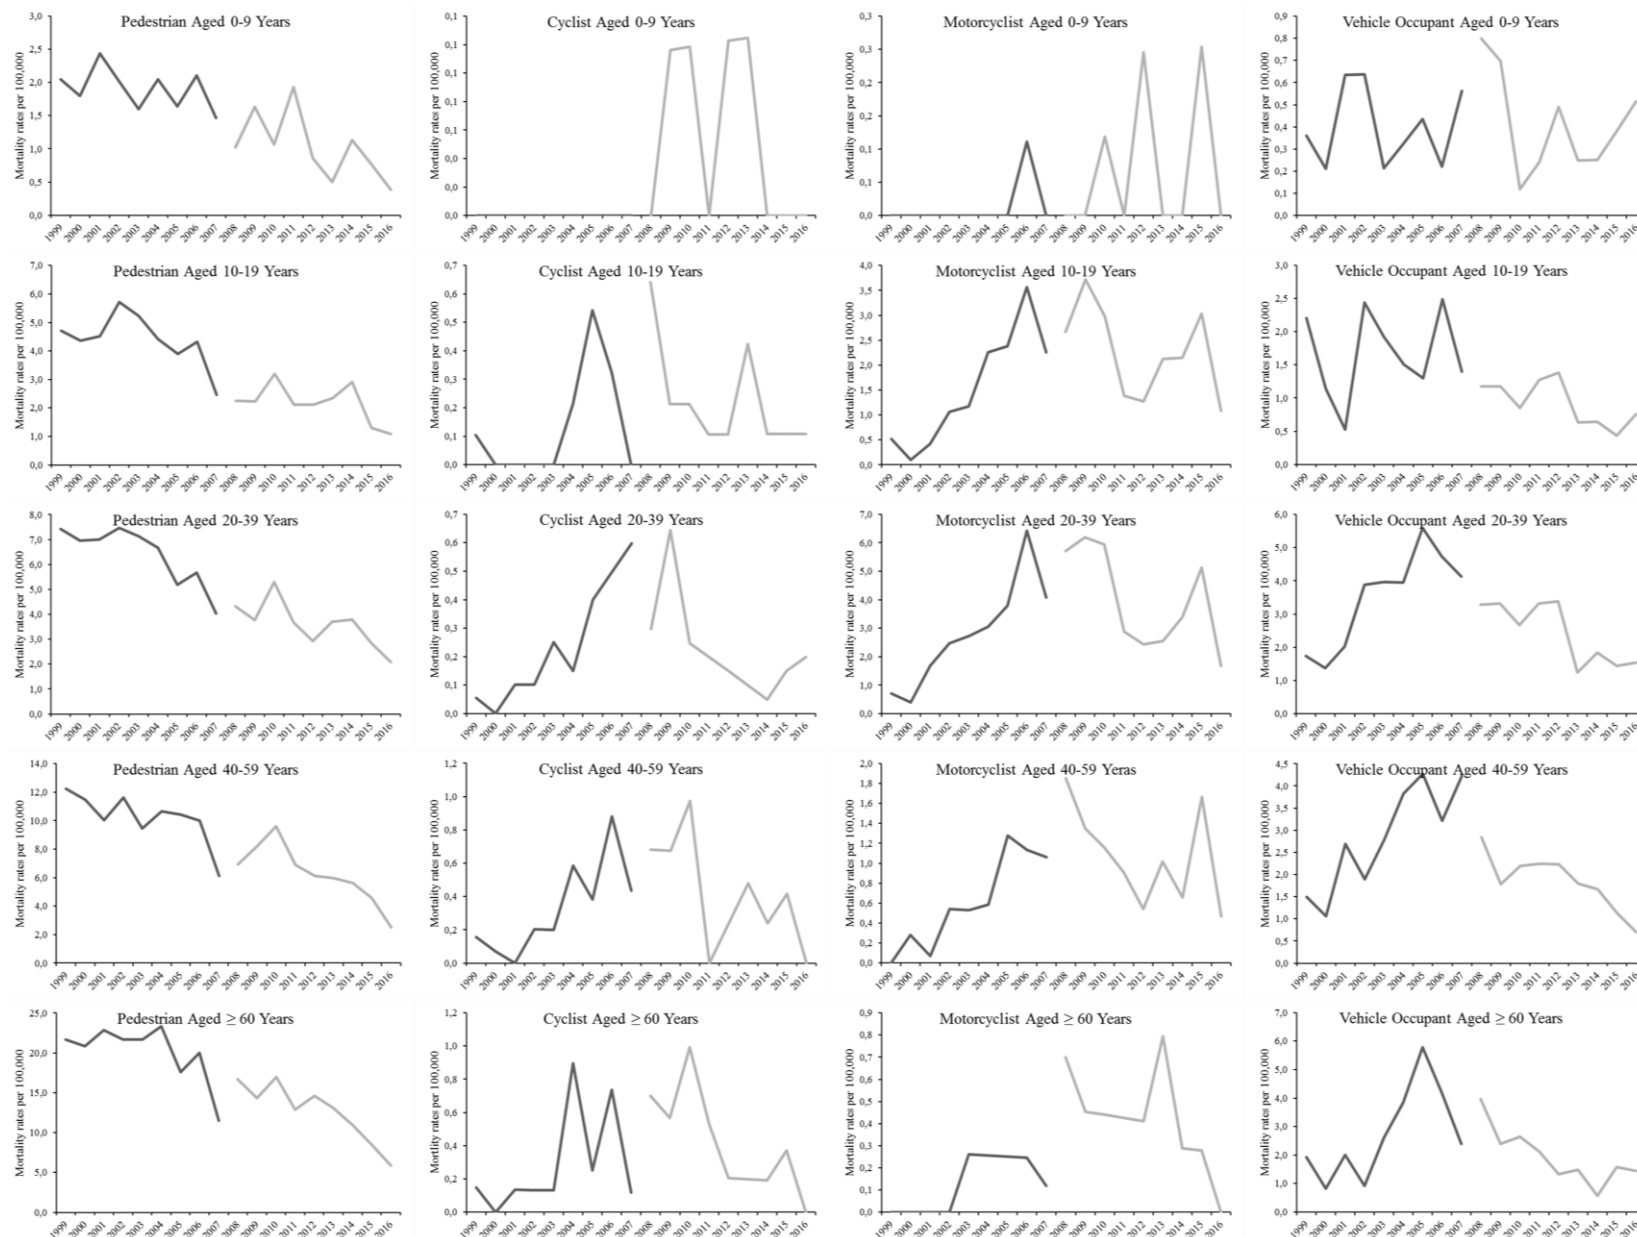

**Appendix 2.** Evolution of mortality rates due to road traffic accidents, by type of victim and according to age group, before and after the Brazilian zero-tolerance drinking and driving law that came into effect on June 19, 2008. Rio de Janeiro, Brazil, 1999-2016
